# Supplementary material for: Single-Copy Nuclear Genes Place Haustorial Hydnoraceae within Piperales and Reveal a Cretaceous Origin of Multiple Parasitic Angiosperm Lineages
Source: PubMed Central journal article supplement (PMC3827129; doi:10.1371/journal.pone.0079204), 2013-11-12

A

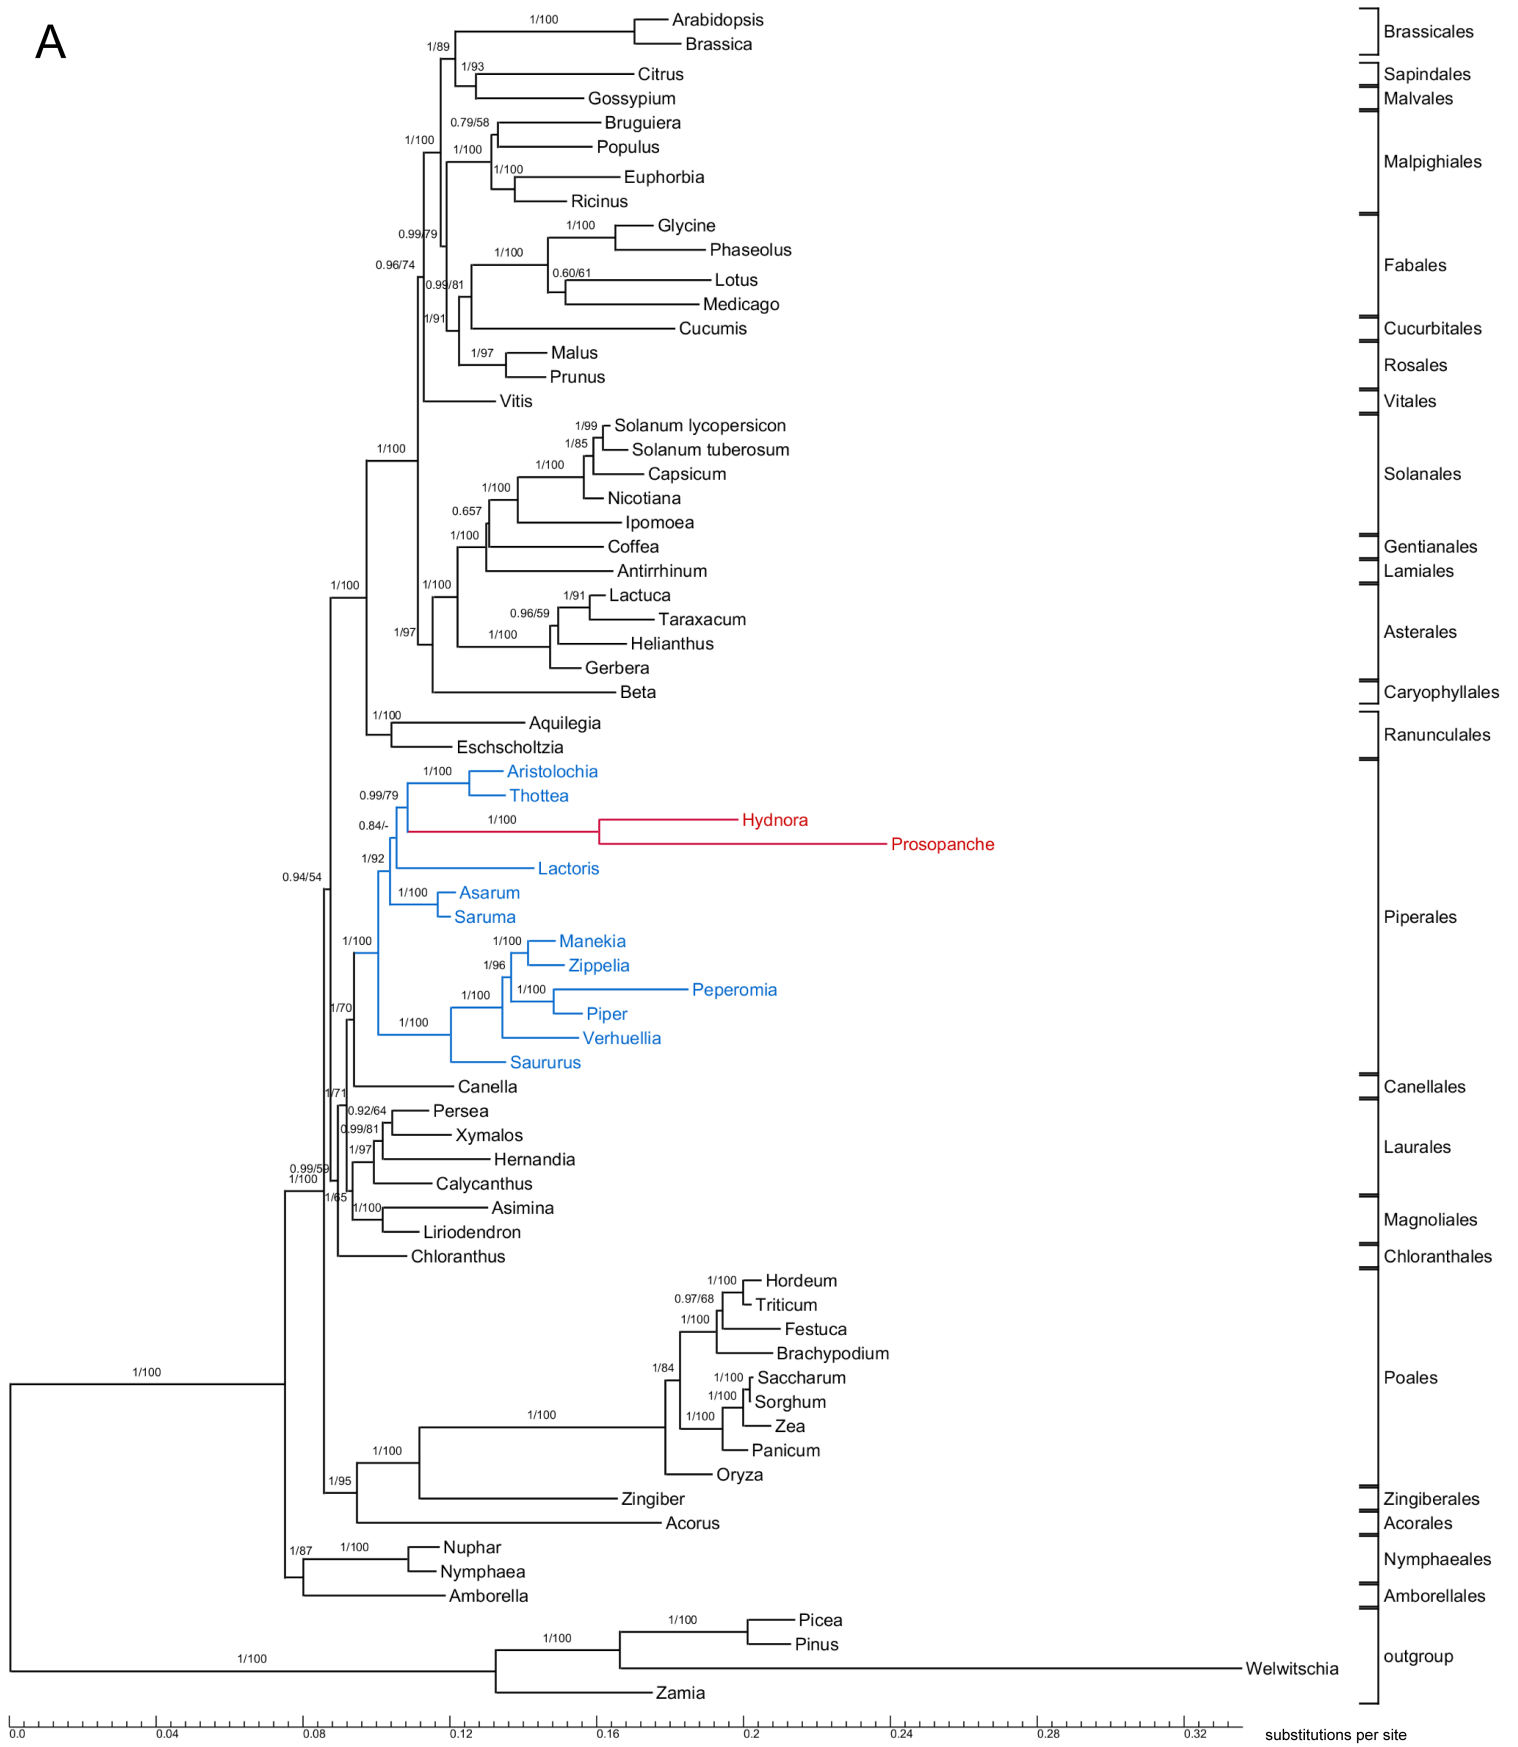

B

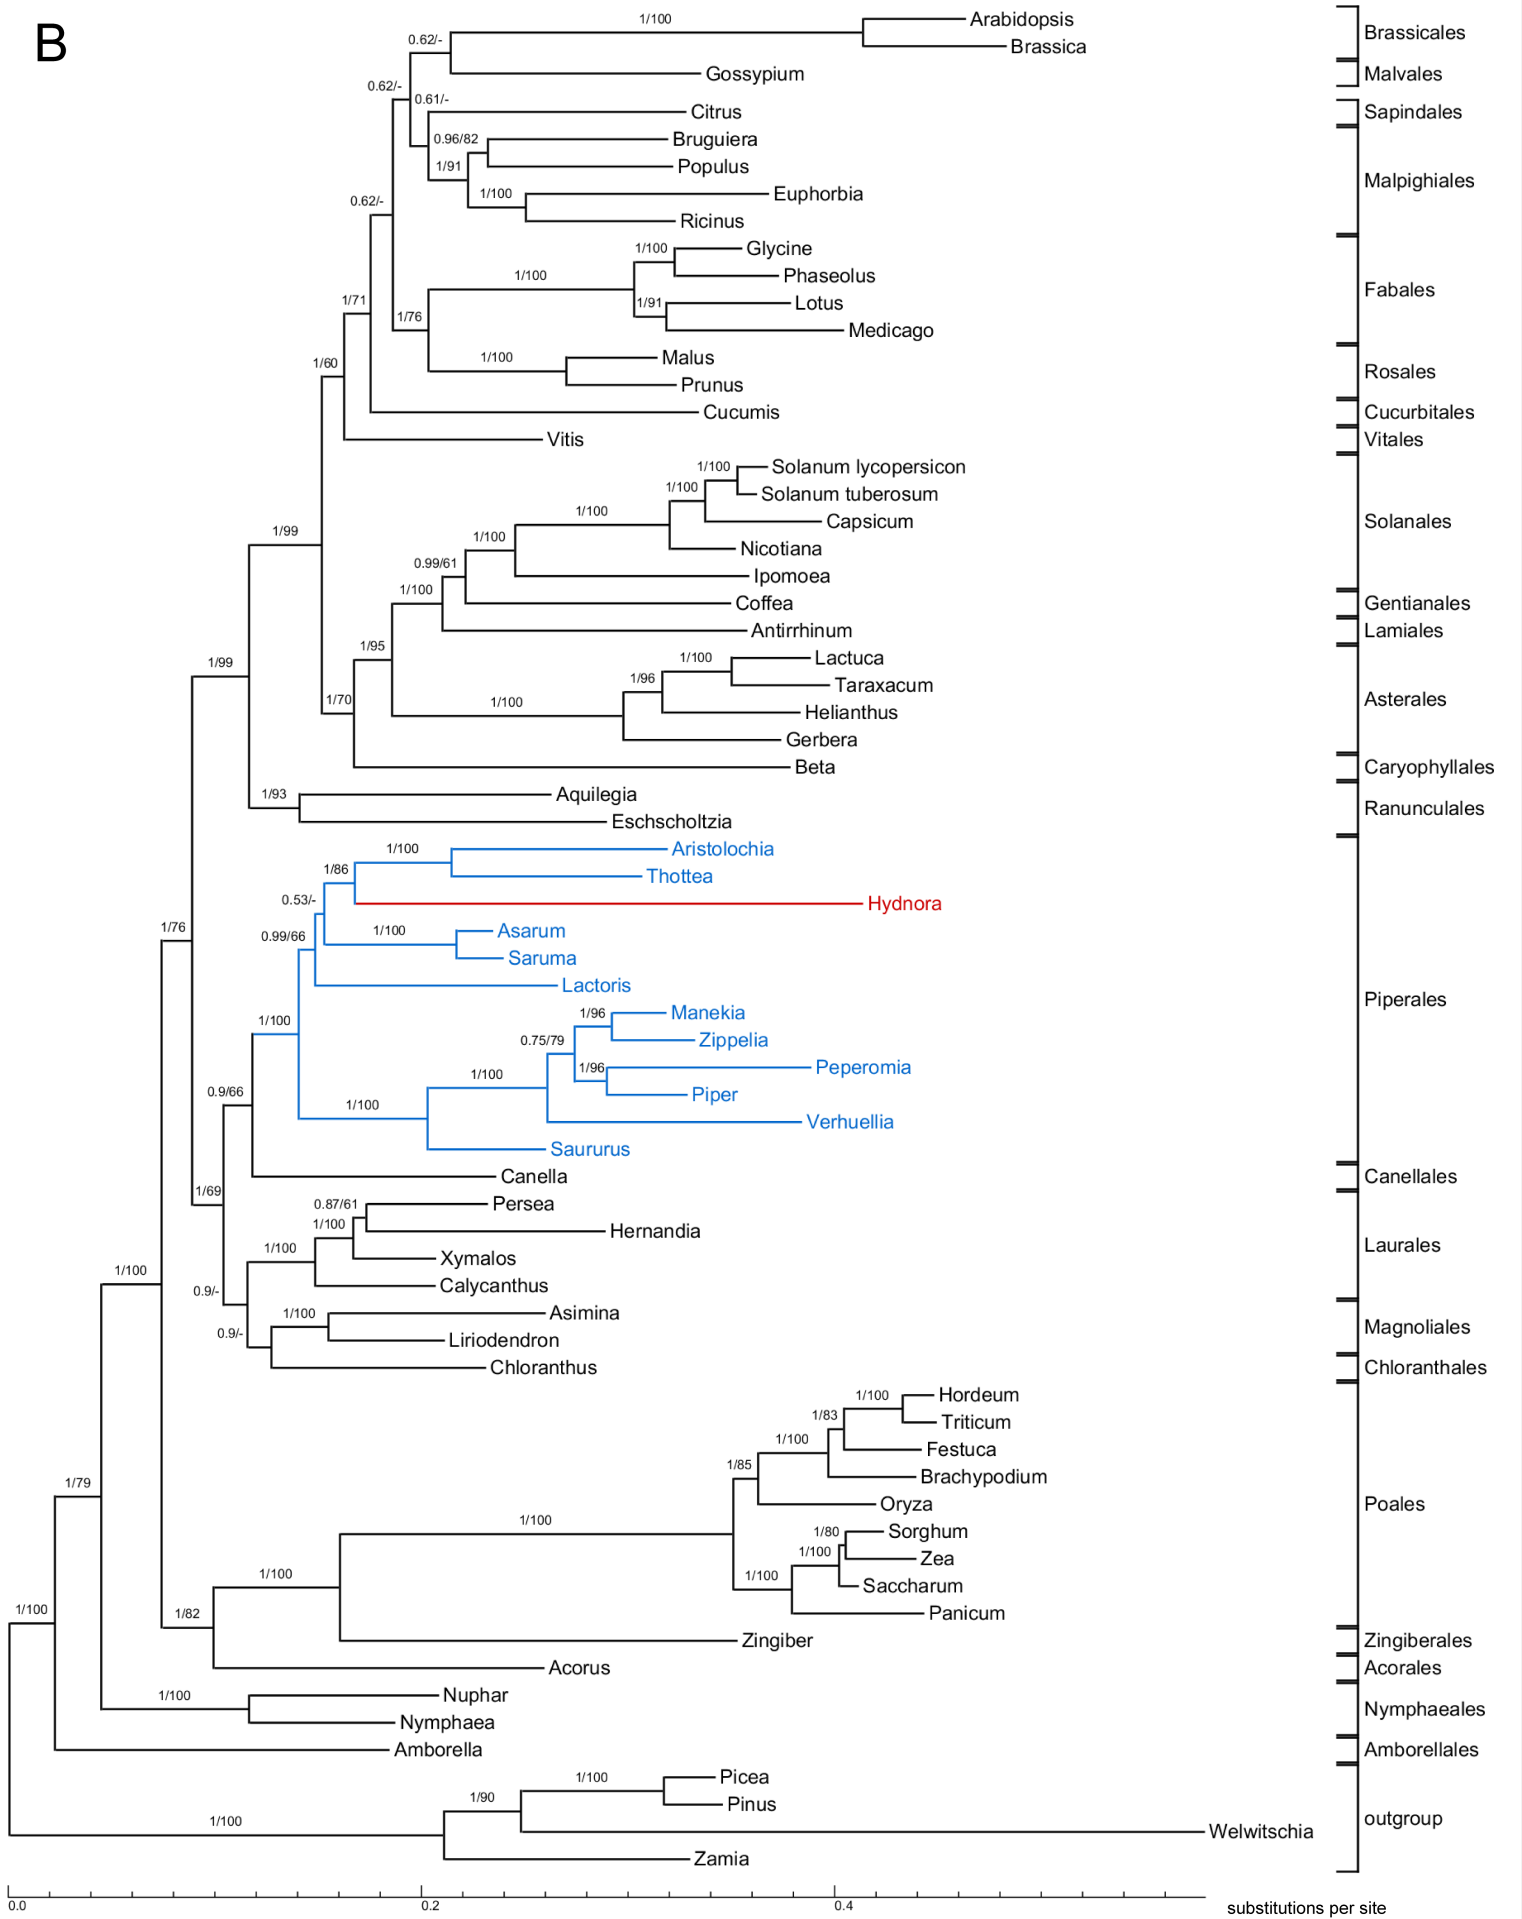

C

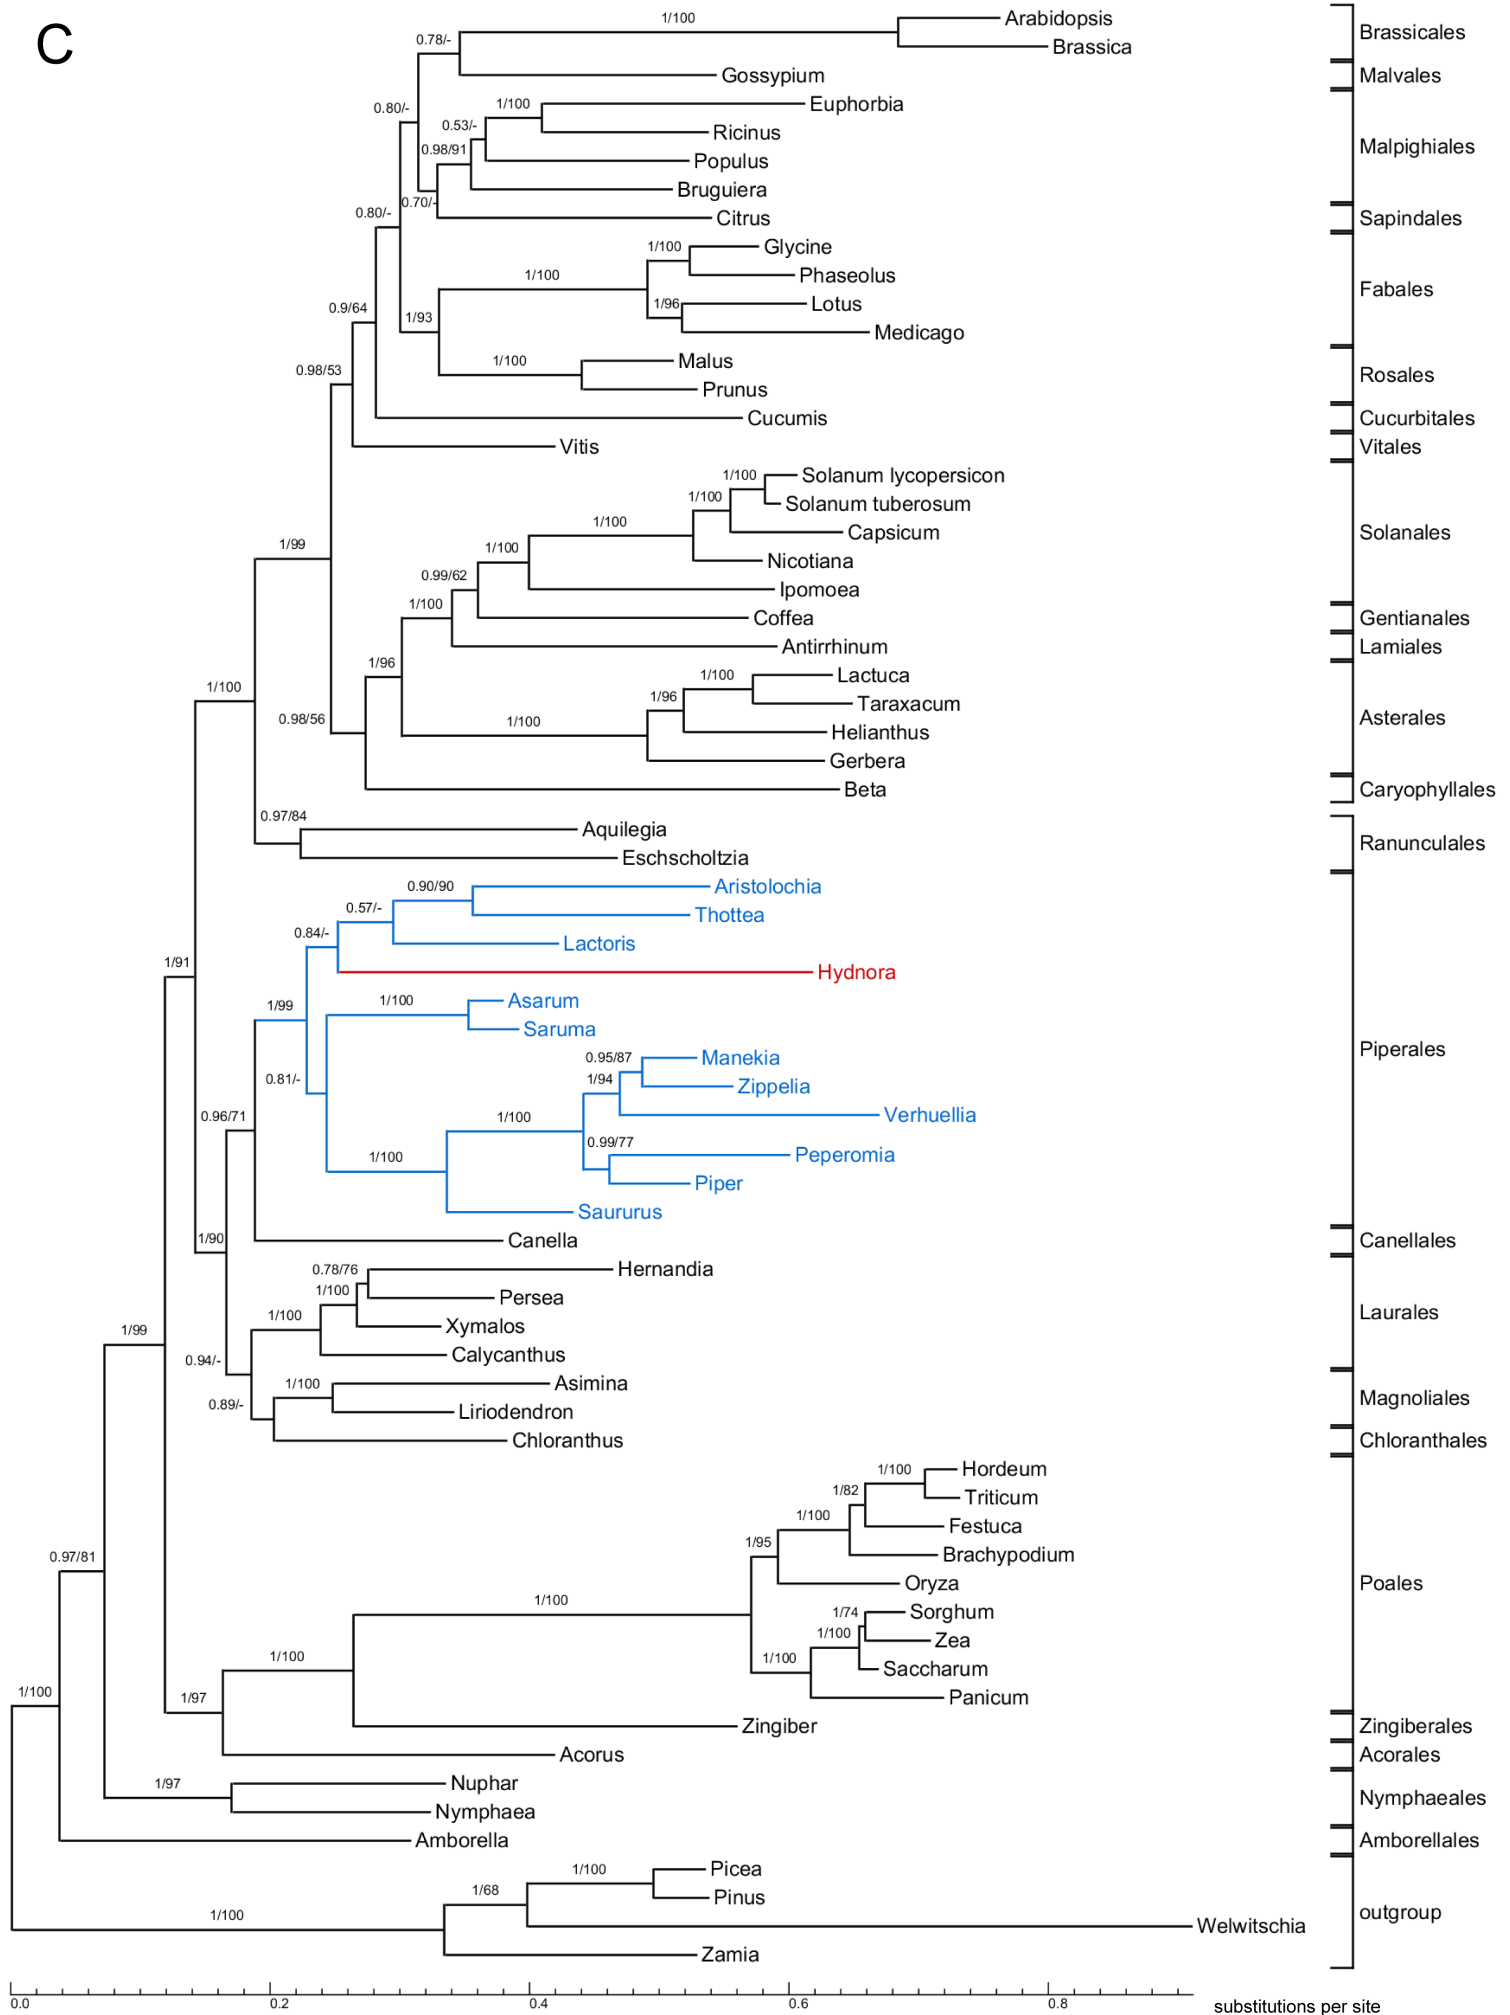

D

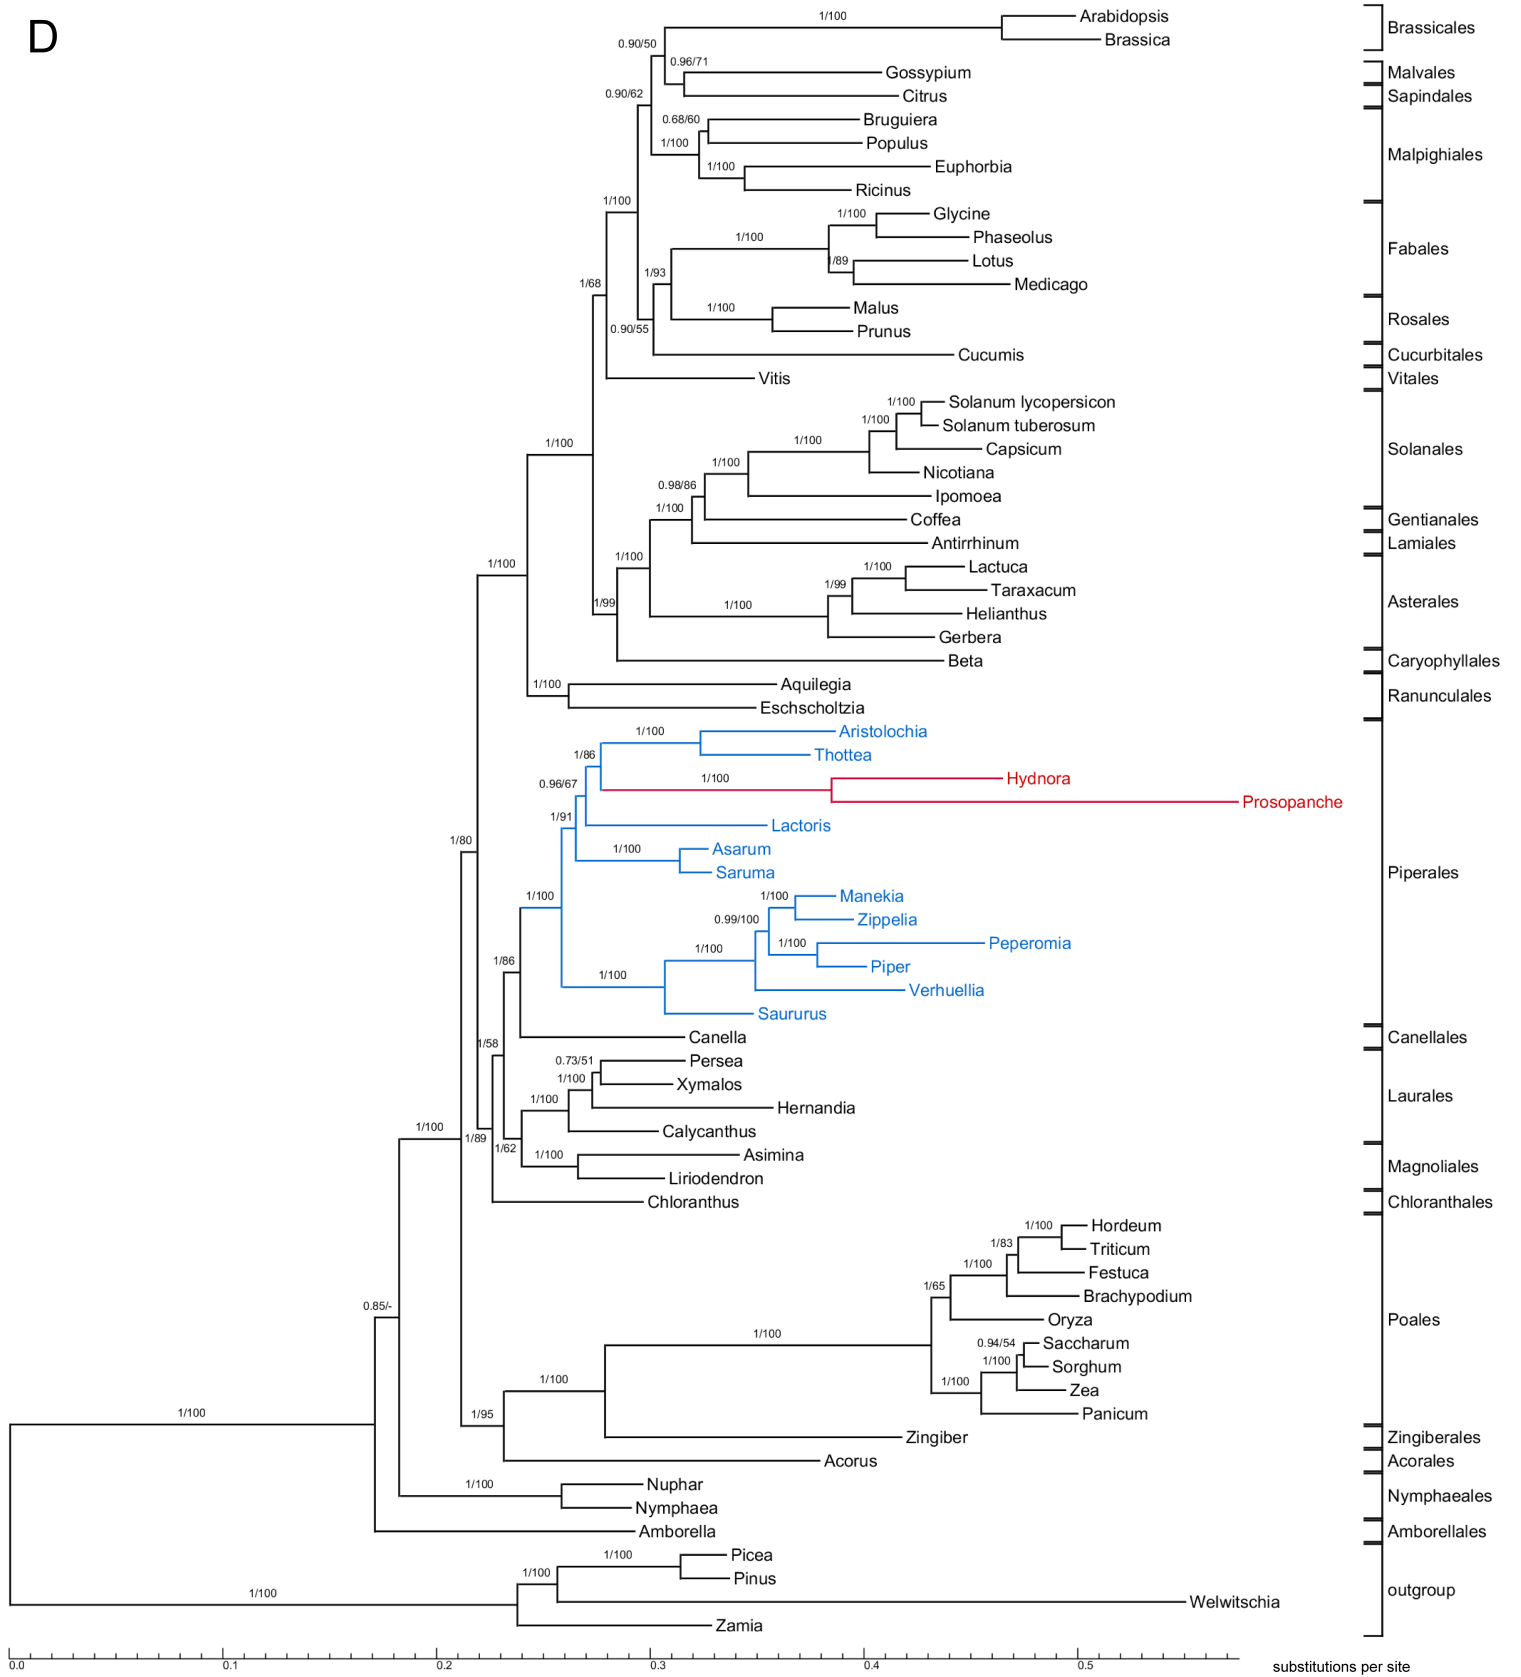

E

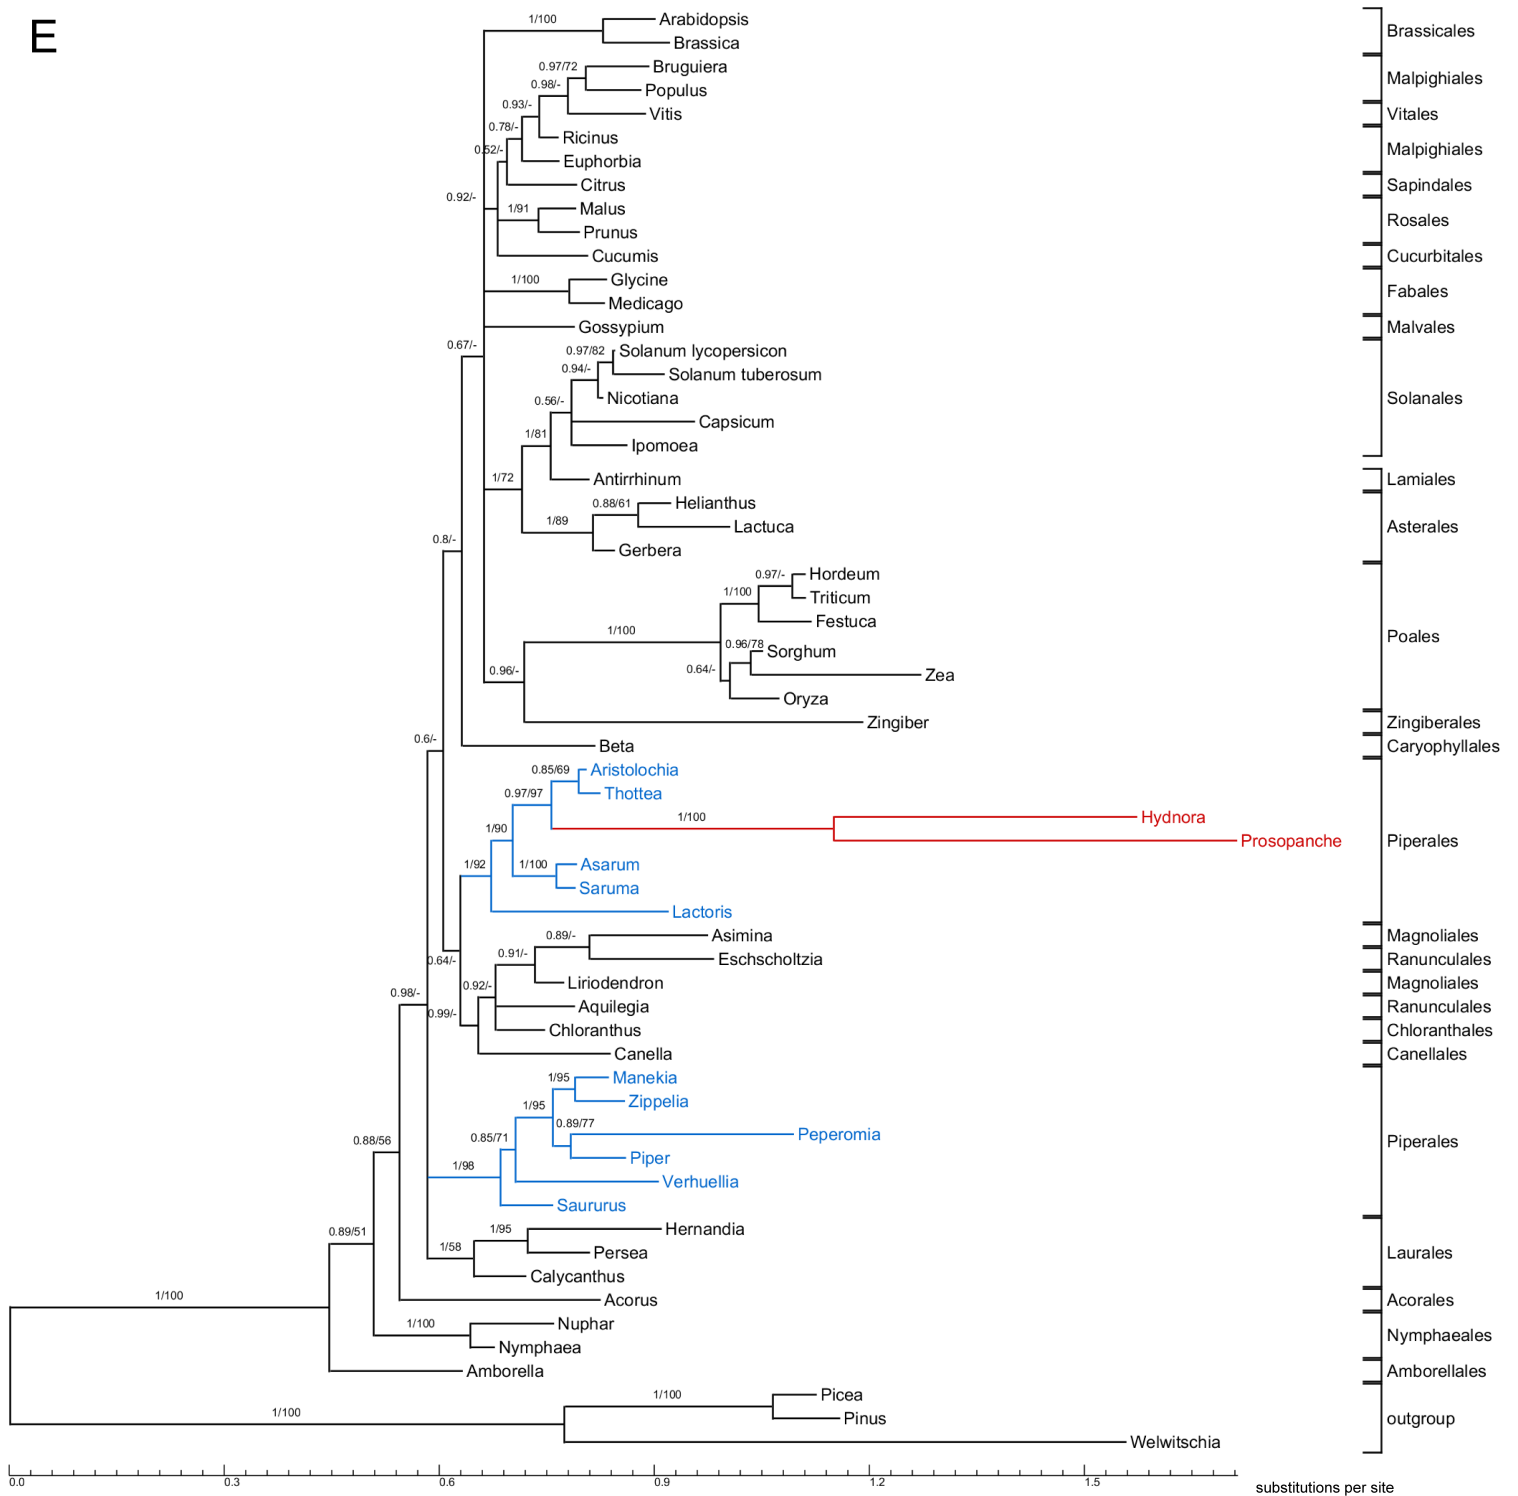

F

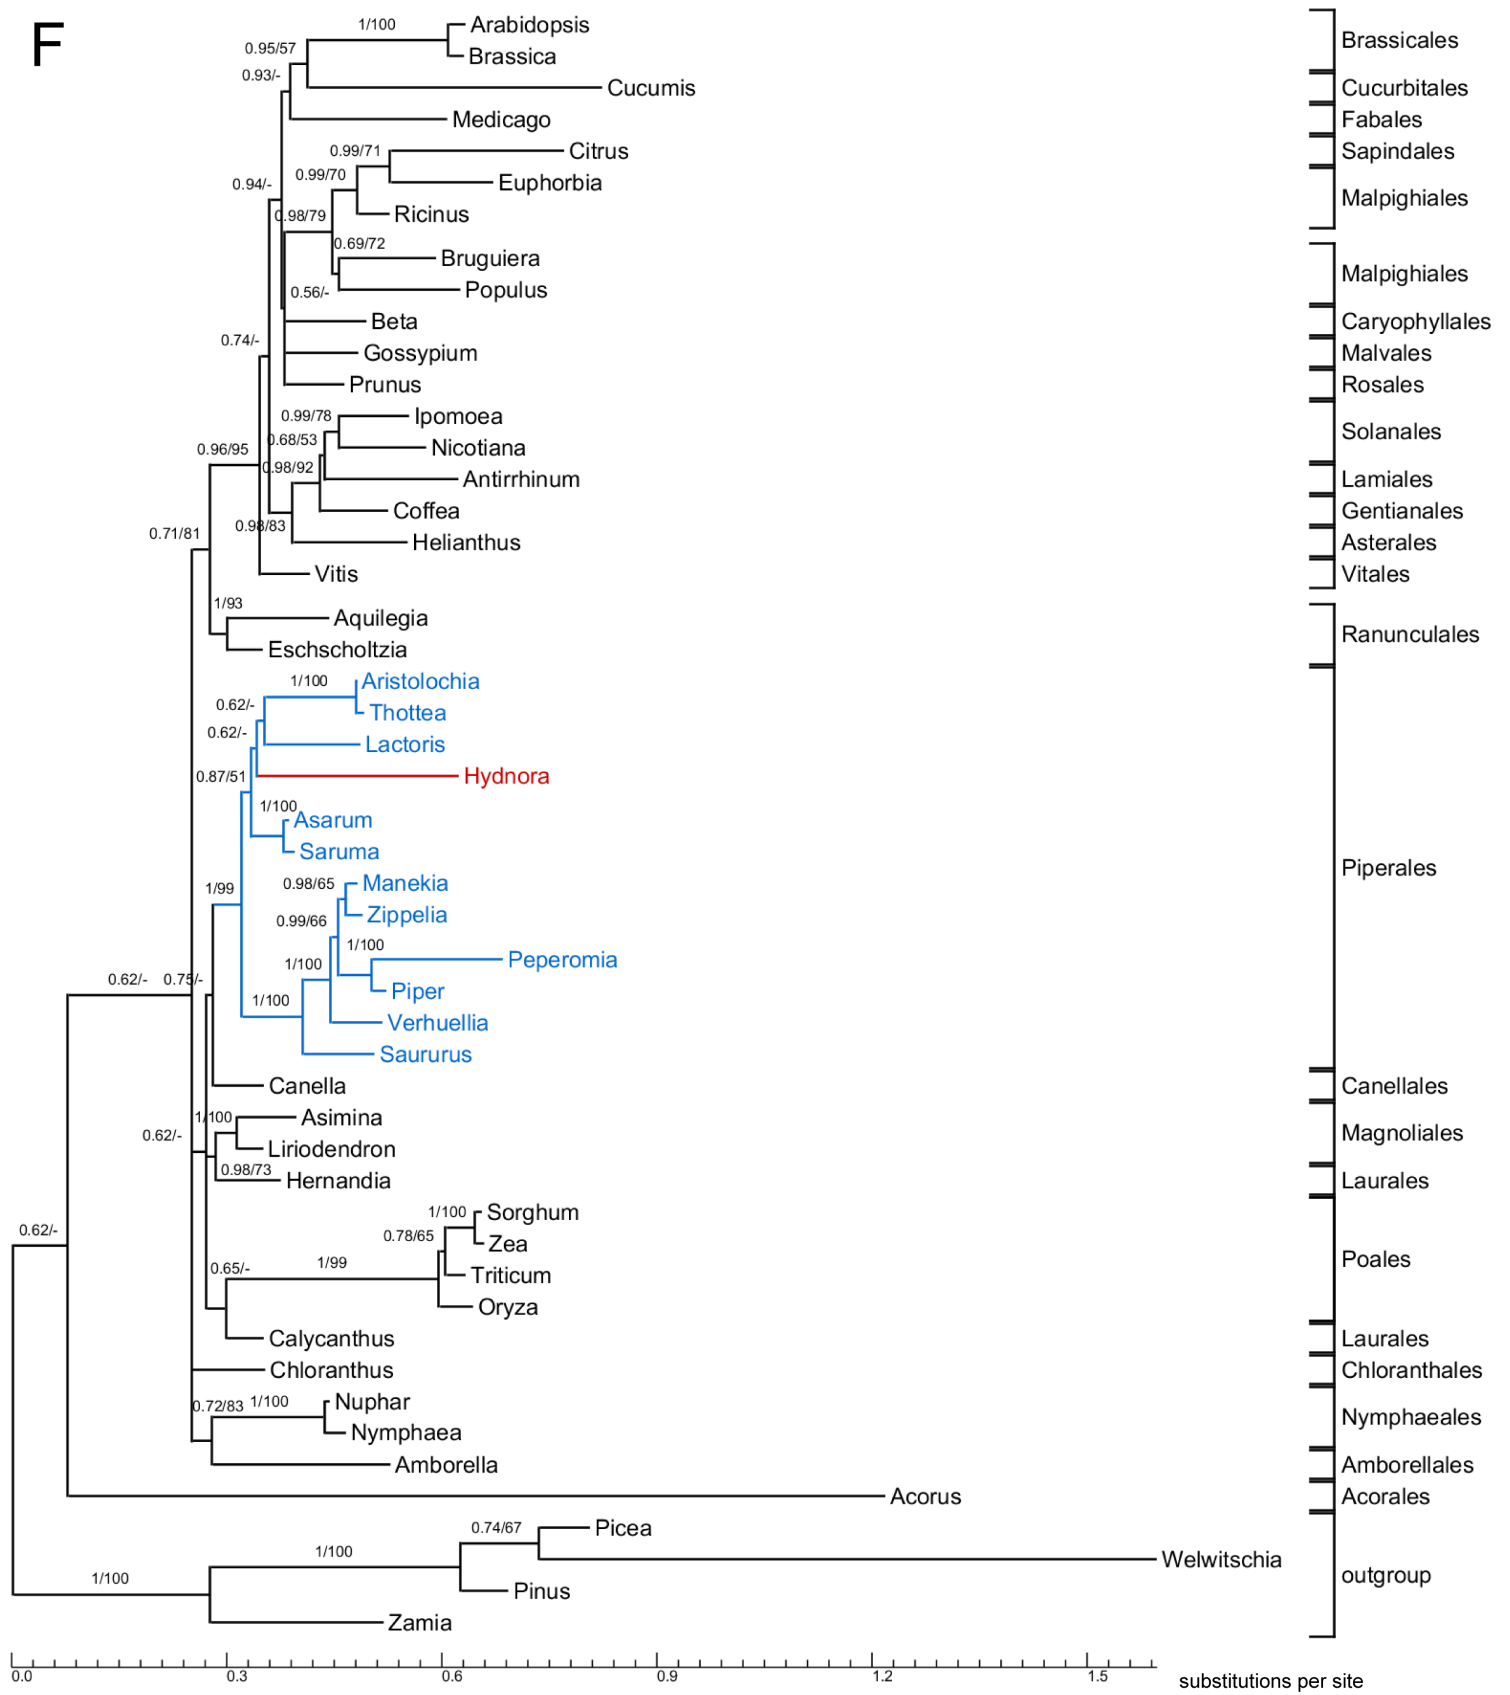

G

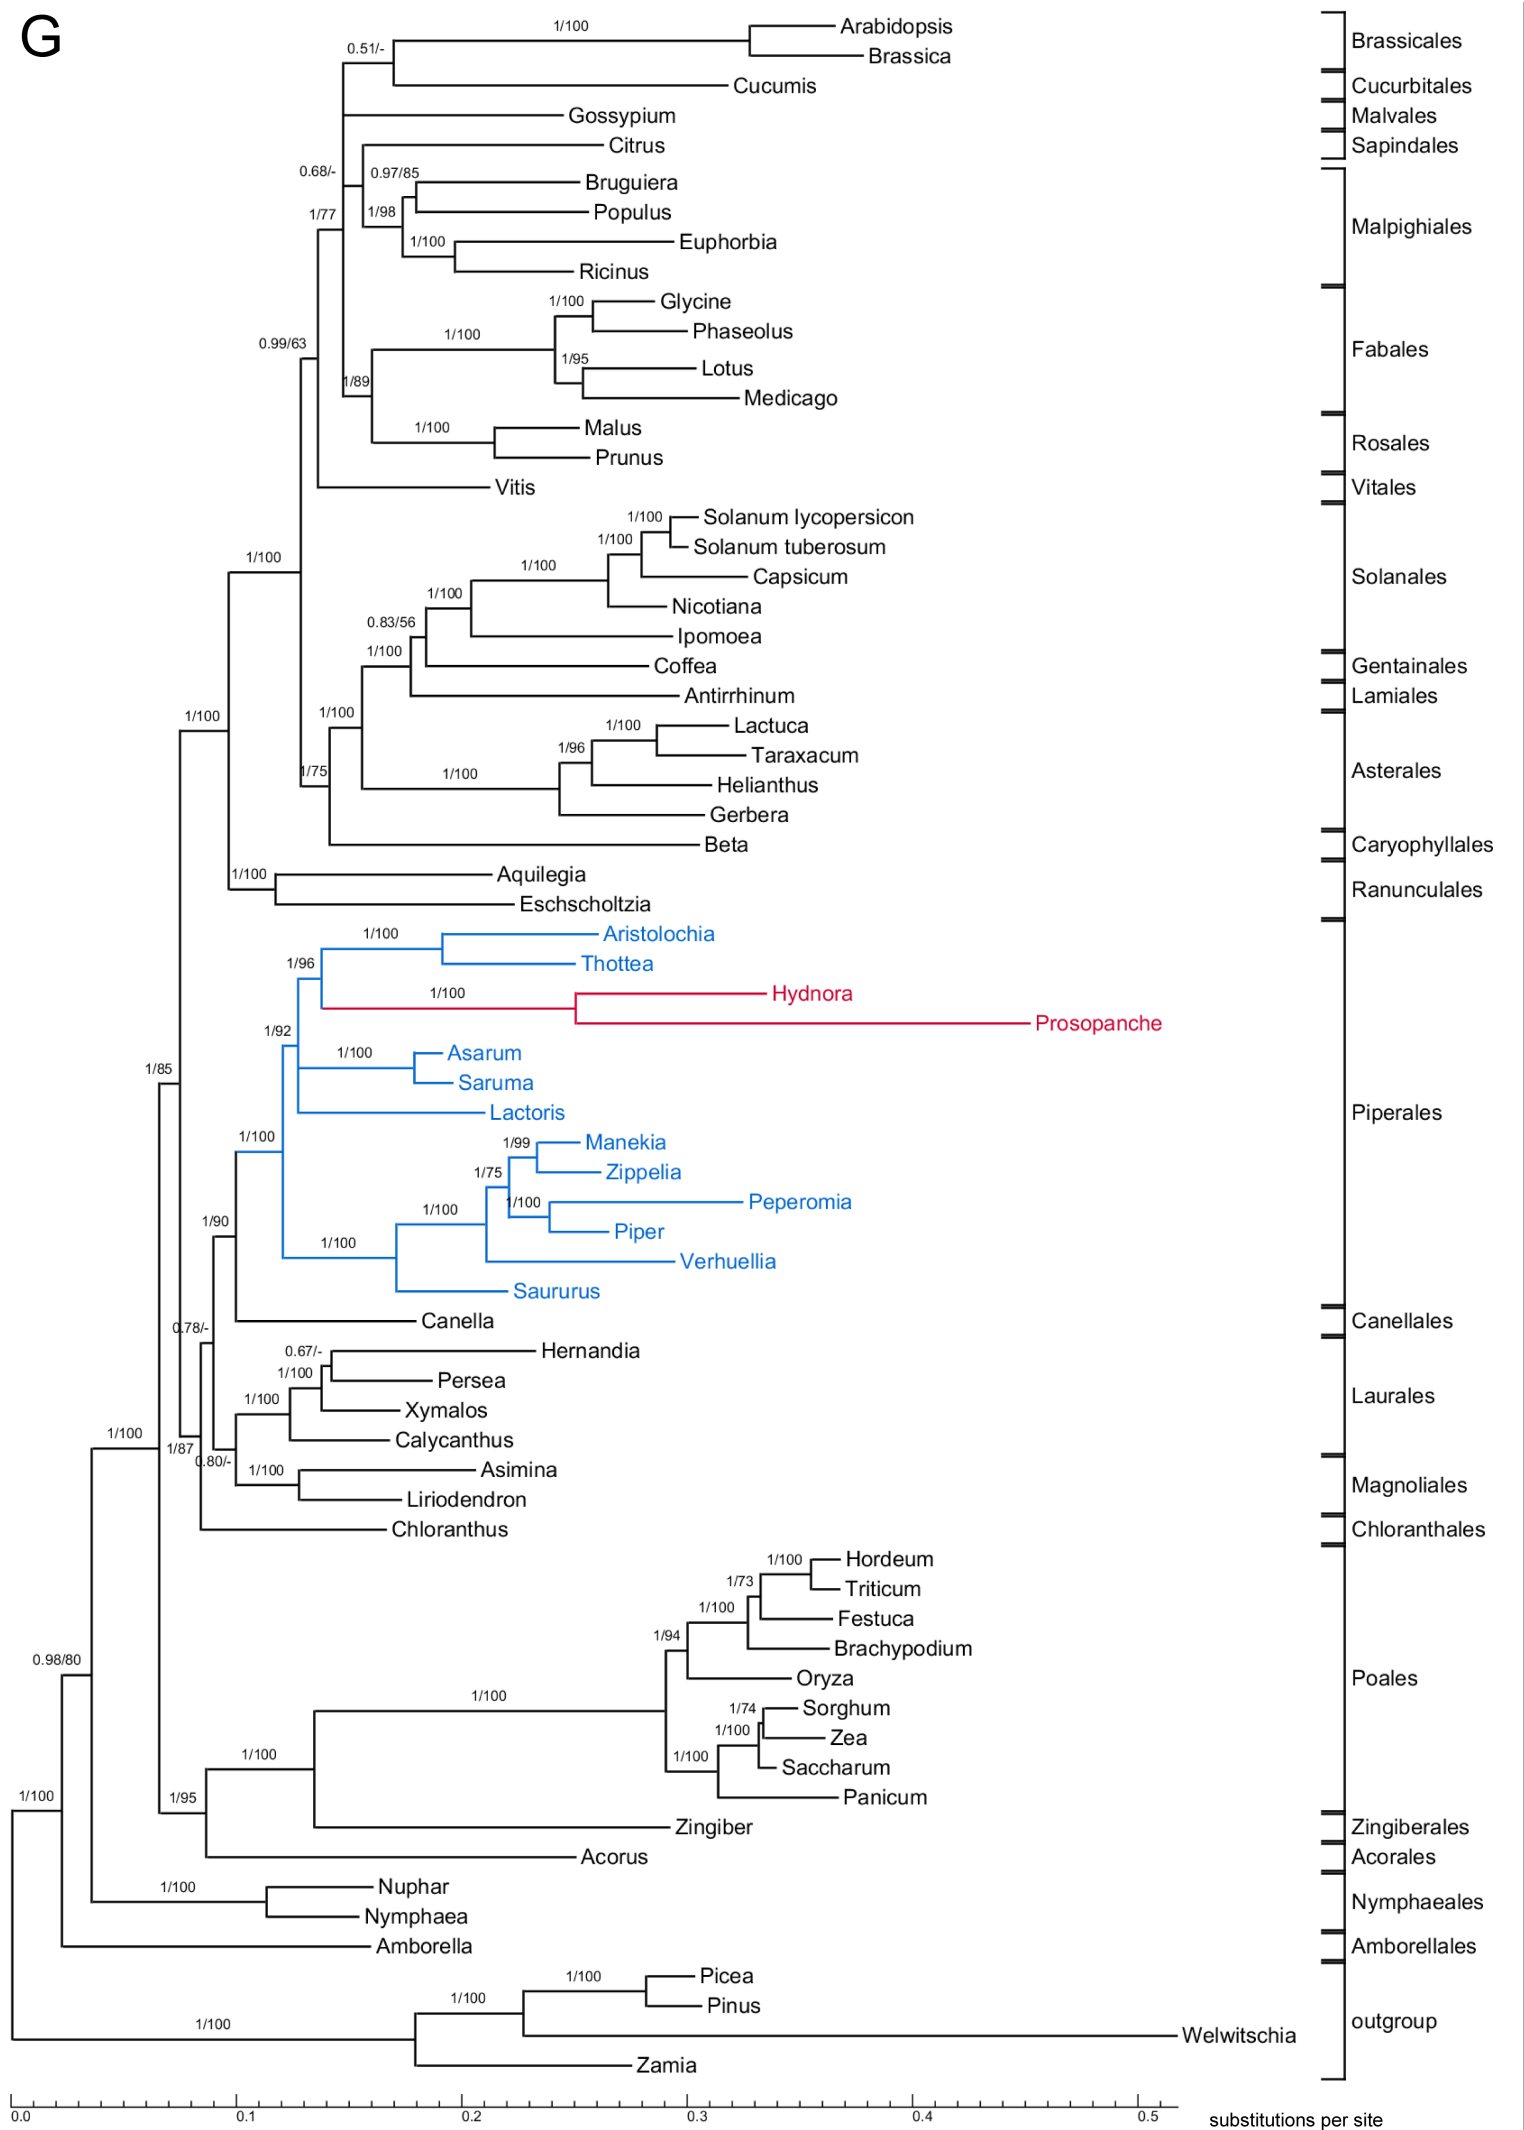

H

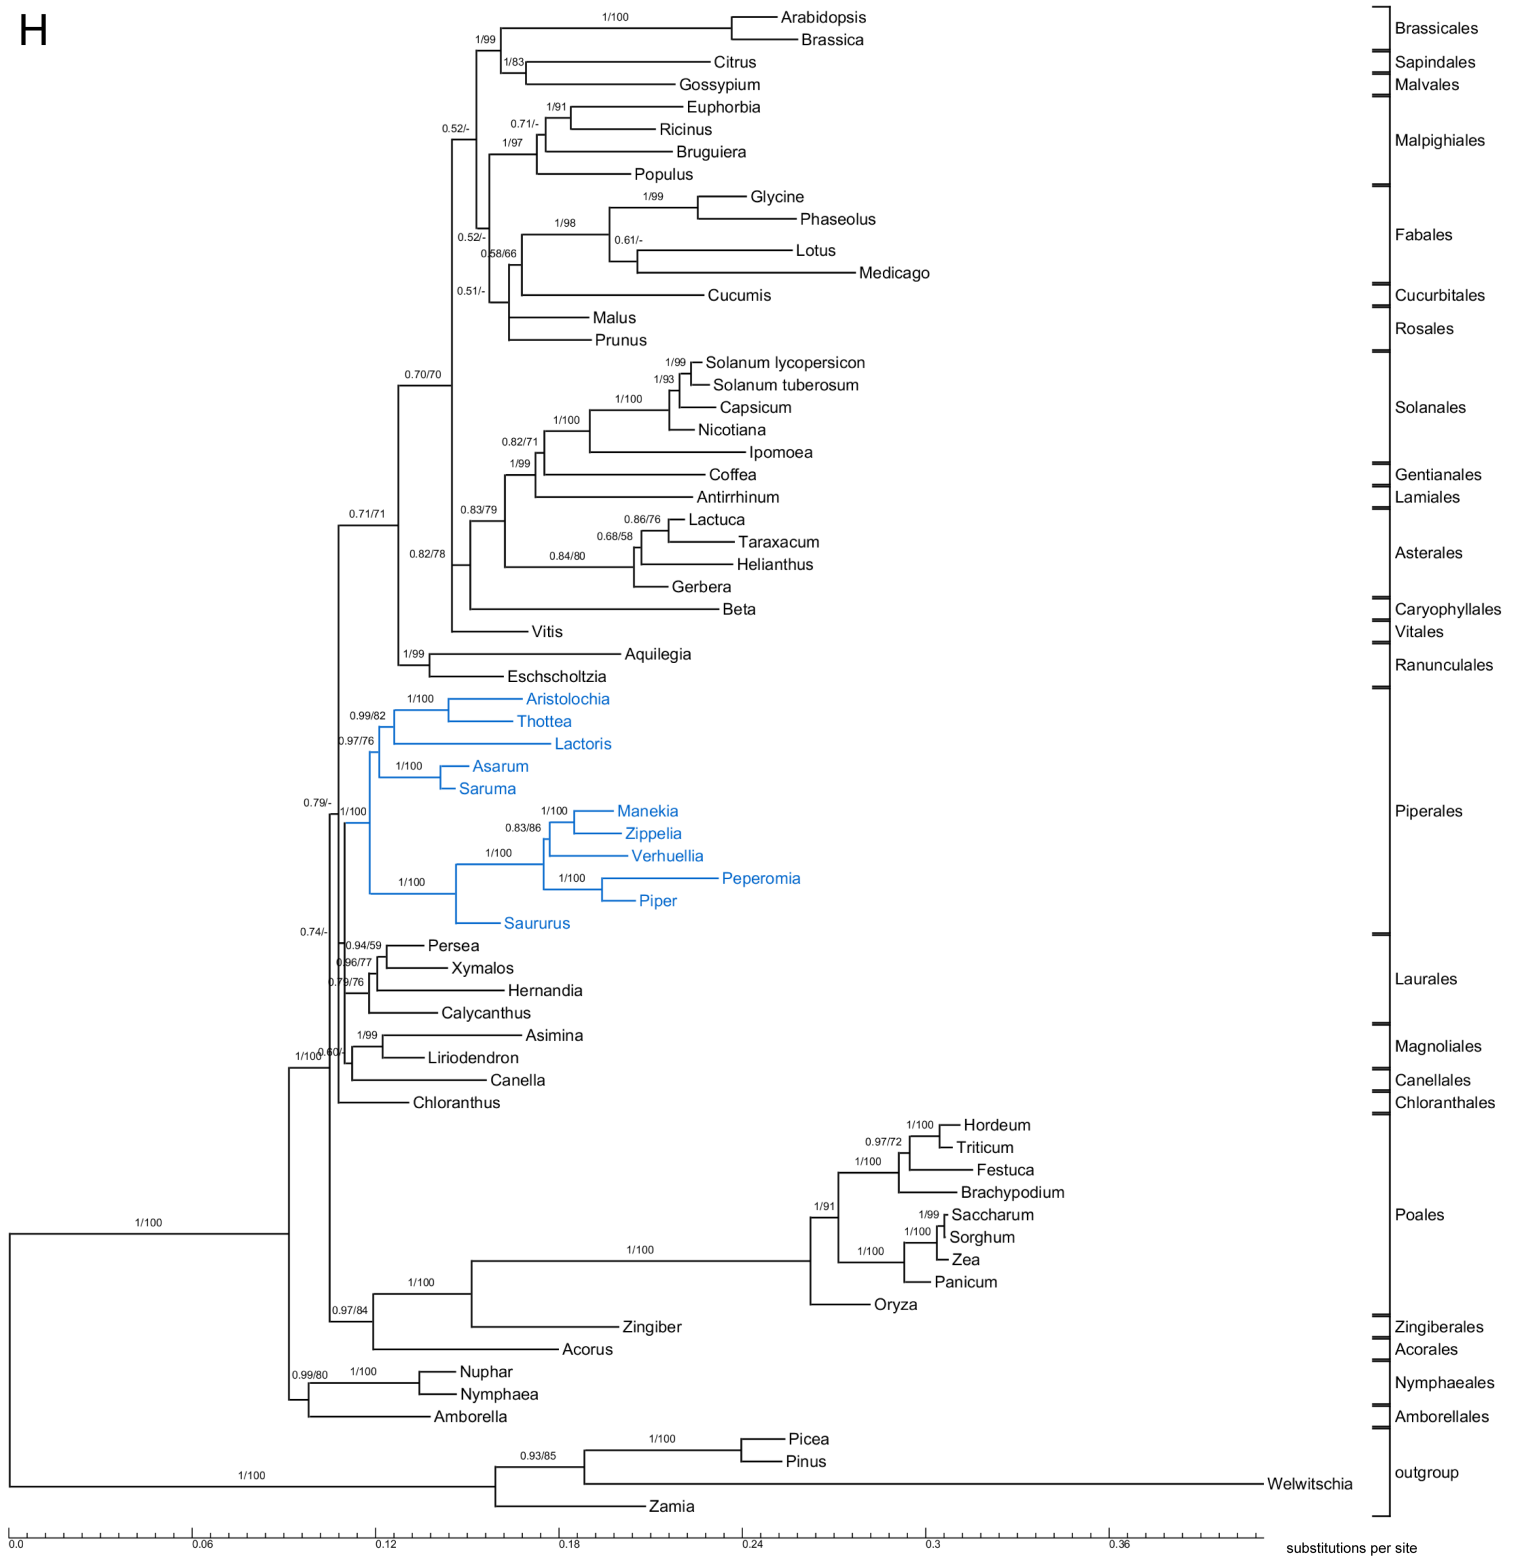

Supplement: pone.0079204.s001.pdf [file pone.0079204.s001.pdf]
